# Supplementary material
Source: publisher figshare collection journal article supplement (https://sage.figshare.com/ndownloader/files/17947829)
Supplement: Supplementary file 1 [file 17947829]

**INSTRUCTIONS:**

## SECTION ONE: PAPER INFORMATION

|              |  |                      |
|--------------|--|----------------------|
| JOURNAL NAME |  |                      |
| PAPER TITLE  |  | MANUSCRIPT ID NUMBER |
|              |  |                      |

- 1) Have made a substantial contribution to the concept or design of the article; or the acquisition, analysis, or interpretation of data for the article; AND
- 2) Drafted the article or revised it critically for important intellectual content; AND
- 3) Approved the version to be published; AND
- 4) Agreed to be accountable for all aspects of the work in ensuring that questions related to the accuracy or integrity of any part of the work are appropriately investigated and resolved.

### SECTION THREE: REASON FOR AUTHORSHIP CHANGE

Please provide a detailed explanation for the change in authors in the box below.

We agree to the proposed change of authorship to the above paper. NB: all authors (added and removed) must sign below.

**DECLARATION: All the below listed authors agree that they can claim authorship to the submitted paper as they meet the criteria of the points listed in SECTION TWO.**

[illegible]

**DECLARATION: All the below listed authors agree that they cannot claim authorship to the submitted paper as they do not (or no longer) meet the criteria of the points listed in SECTION TWO.**

List of removed authors. Please sign, indicating your agreement to be removed from the list of registered authors. The individuals listed below will not be credited as authors in the published paper. (Please ask if additional rows are required.)

[illegible]
